# Supplementary material for: Aminated and amidated structures introduced by ethylenediamine pretreatment endow lignin with bright fluorescence
Source: Royal Society of Chemistry journal article supplement (doi:10.1039/d2gc02120j), 2022-01-01
Supplement: d2gc02120j1.pdf [file d2gc02120j1.pdf]

Supporting Information for

**Aminated and amidated structures  
introduced by ethylenediamine pretreatment  
endow lignin with bright fluorescence**

*Tao Shi, ‡<sup>a</sup> Li Xu, ‡<sup>a</sup> Ya-Nan Wang,<sup>b</sup> Shi-Chang Liu,<sup>a</sup> Zhi-Hua Liu,<sup>a</sup> Guang-Jiu Zhao,<sup>b</sup>*

*Bing-Zhi Li <sup>\*a</sup> and Ying-Jin Yuan<sup>a</sup>*

- a. Frontiers Science Center for Synthetic Biology and Key Laboratory of Systems Bioengineering (Ministry of Education), School of Chemical Engineering and Technology, Tianjin University, Tianjin 300072, PR China.
- b. Molecular Dynamic Chemistry Center, Tianjin Key Laboratory of Molecular Optoelectronic Sciences, Department of Chemistry, School of Science, Tianjin University, Tianjin 300354, China.

‡ These authors contributed equally to this work.

\* Corresponding author, Email: bzli@tju.edu.cn

This supporting information contains:

Total number of pages: 12

Total number of Figures: 11

Total number of Tables: 3

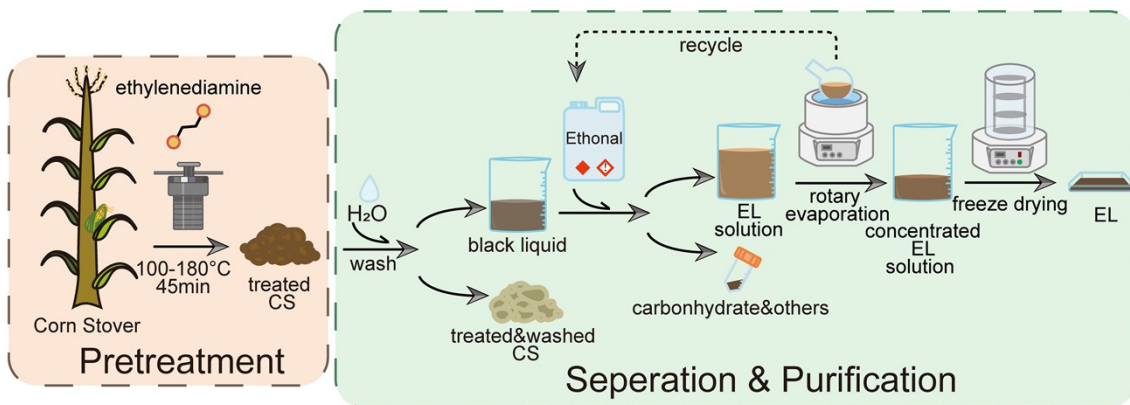

### The fractionation process to obtain EDA-Lignin (EL)

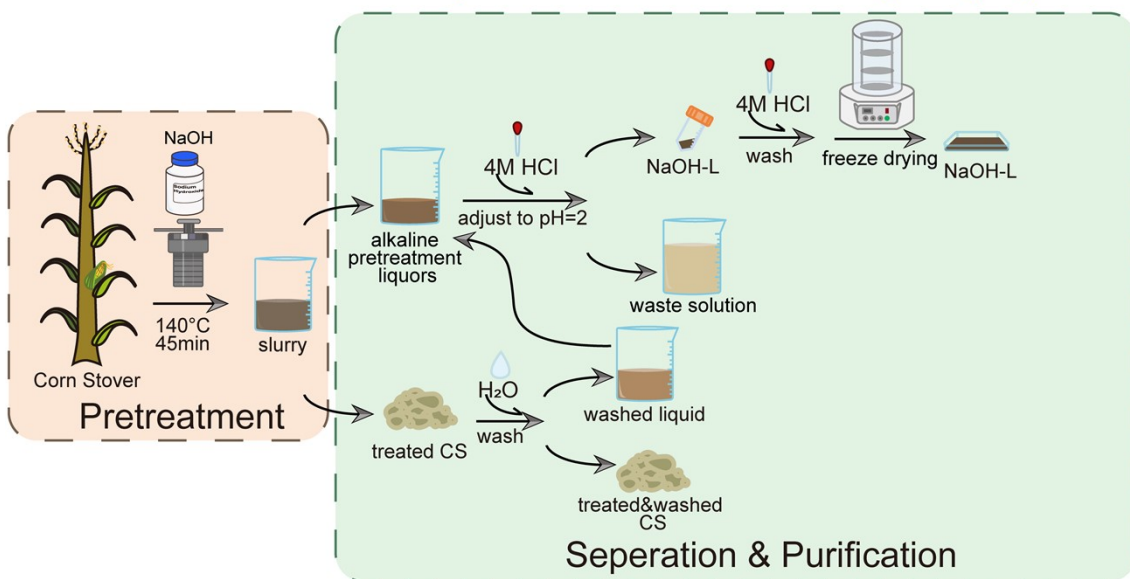

### The fractionation process to obtain NaOH Lignin (NaOH-L)

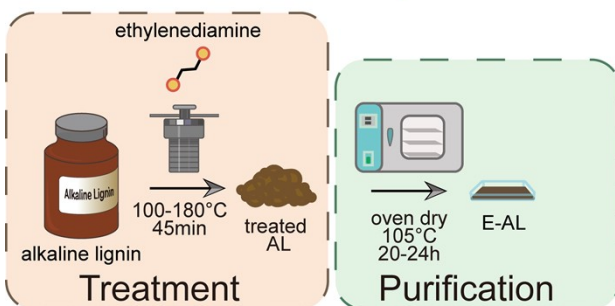

### The fractionation process to obtain EDA-Alkaline Lignin (E-AL)

Fig. S1 The pretreatment processes to prepare different lignin samples.

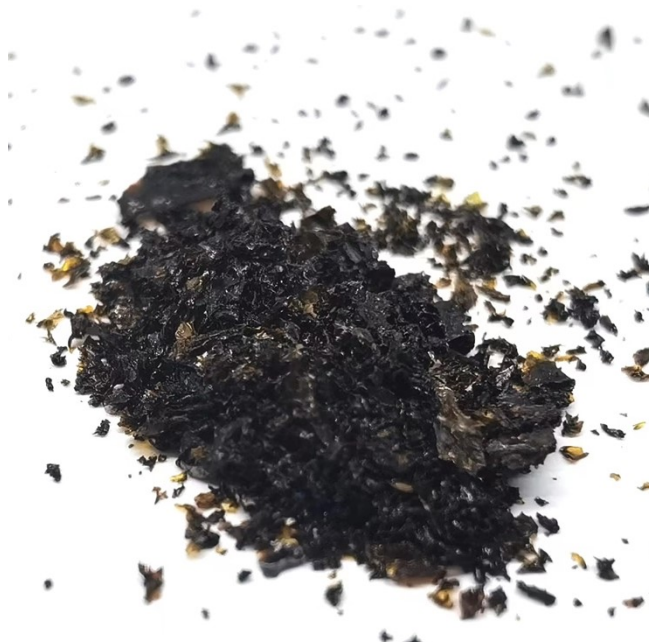

**Fig. S2** Appearance of aminated lignin (120EL), which presents in a brown to black sheet-like solid form.

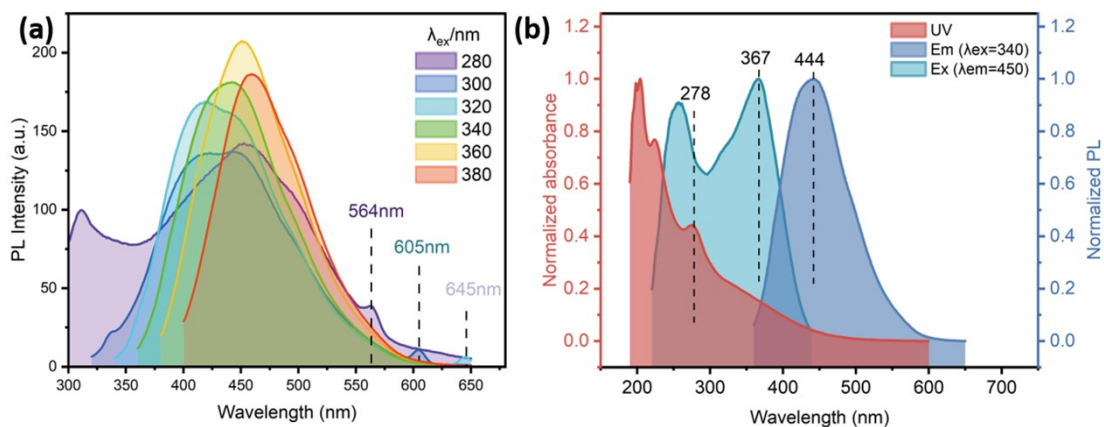

**Fig. S3 a)** Emission spectrum excited at difference  $\lambda_{ex}$  and **b)** excitation spectrum emitted at 340 nm, PL spectra excited at 340 nm, and UV-vis spectrum of 180EL ( $c=0.1\text{g/L}$ ).

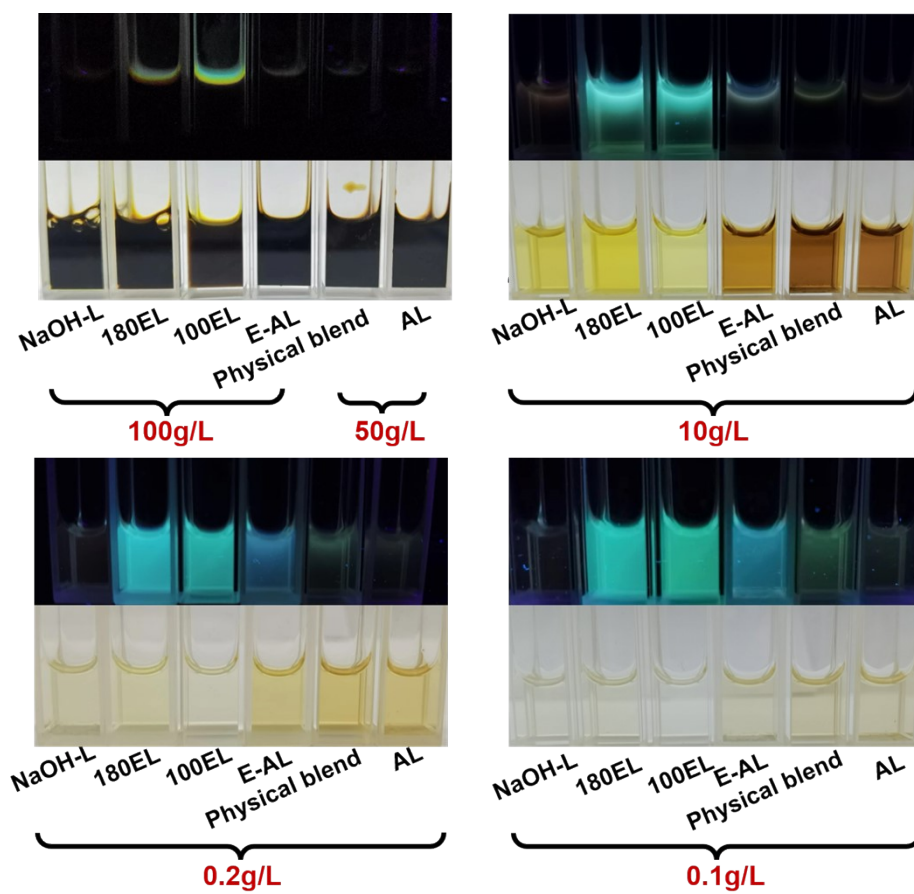

**Fig. S4** Fluorescent images of lignin aqueous solutions taken under 365 nm UV light

(from a top light);

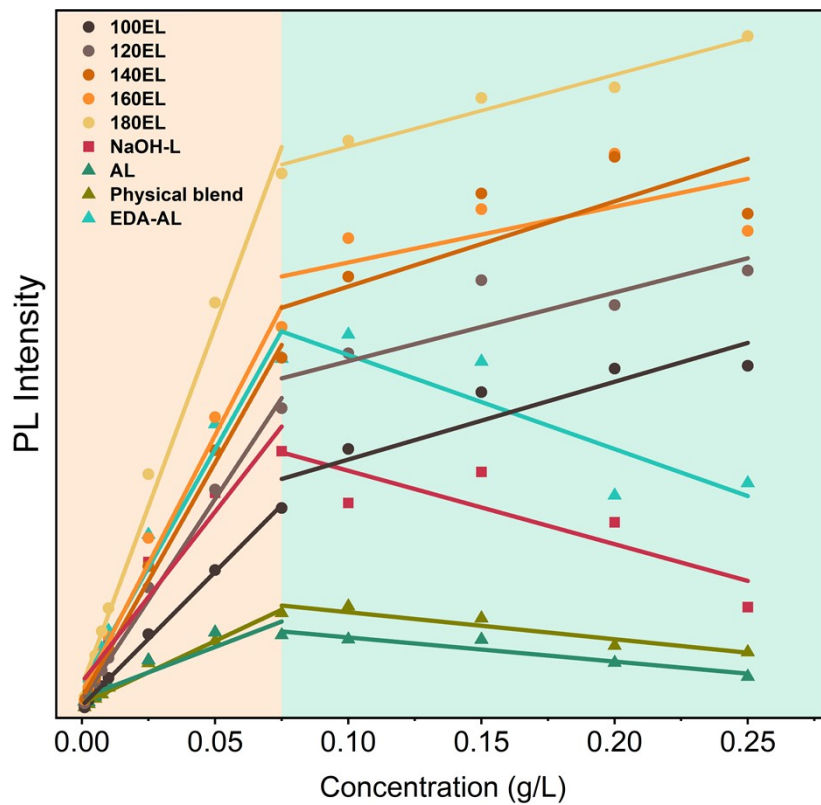

**Fig. S5** Two stages of linear regions of concentration-fluorescence intensity; related parameters were shown in tables S1 and S2.

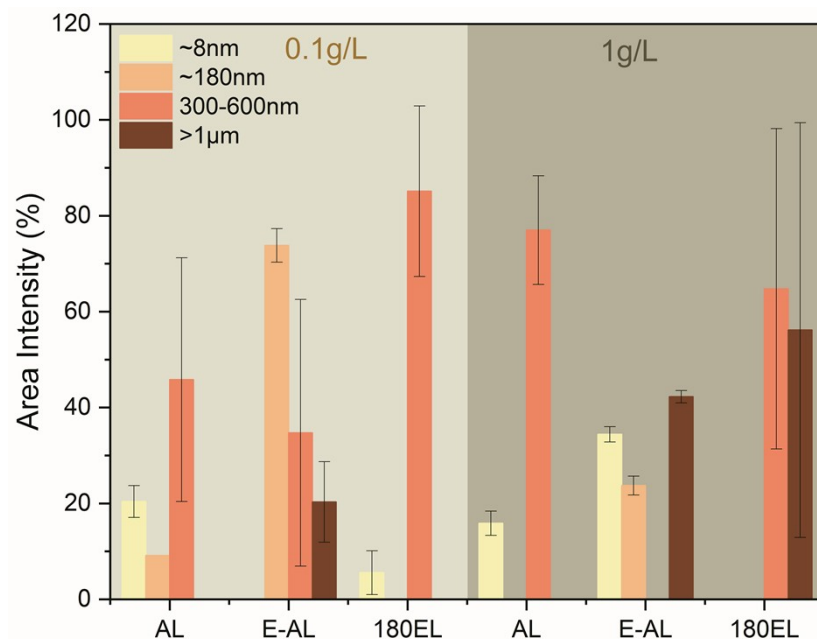

**Fig. S6** Particle diameter distribution at two different concentrations (0.1g/L and 1g/L).

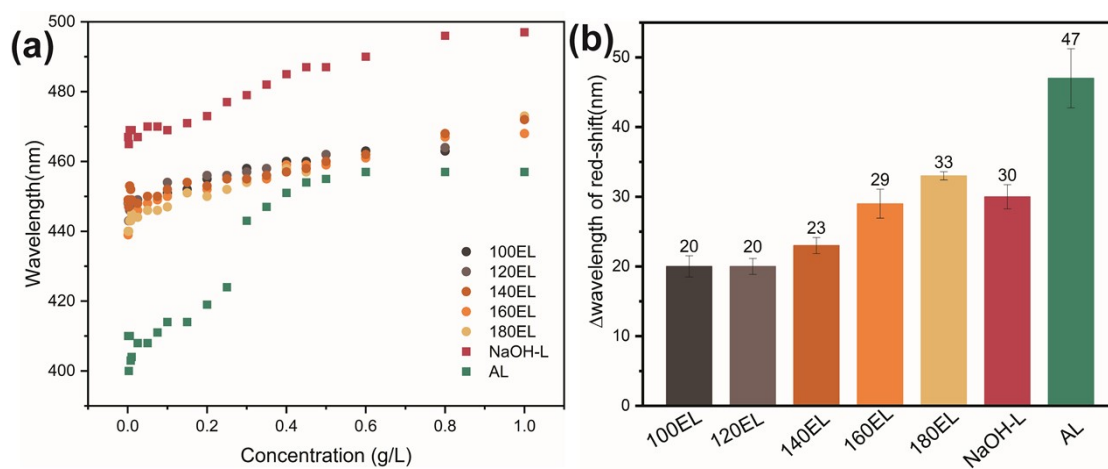

**Fig. S7** Red-shift of max emission wavelength affected by increasing concentration.

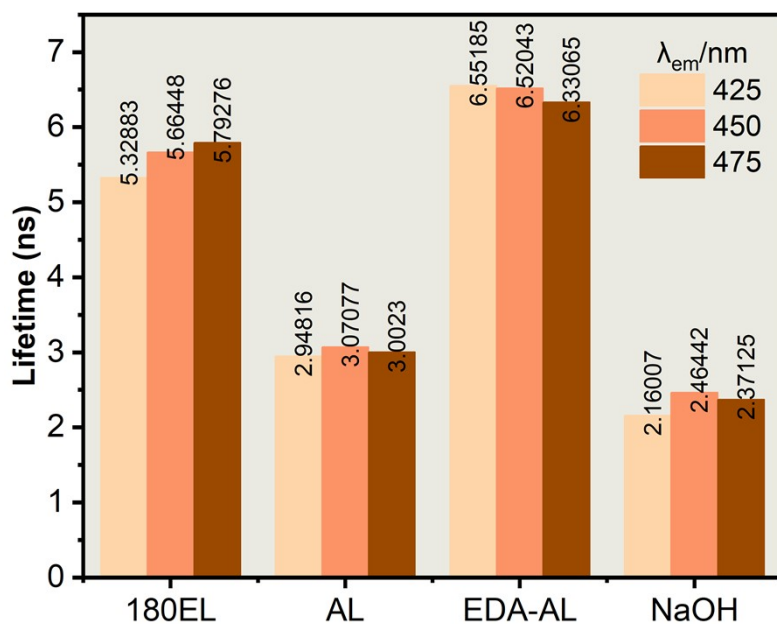

Fig. S8 PL lifetimes at different emission wavelength ( $c= 0.1\text{g/L}$ )

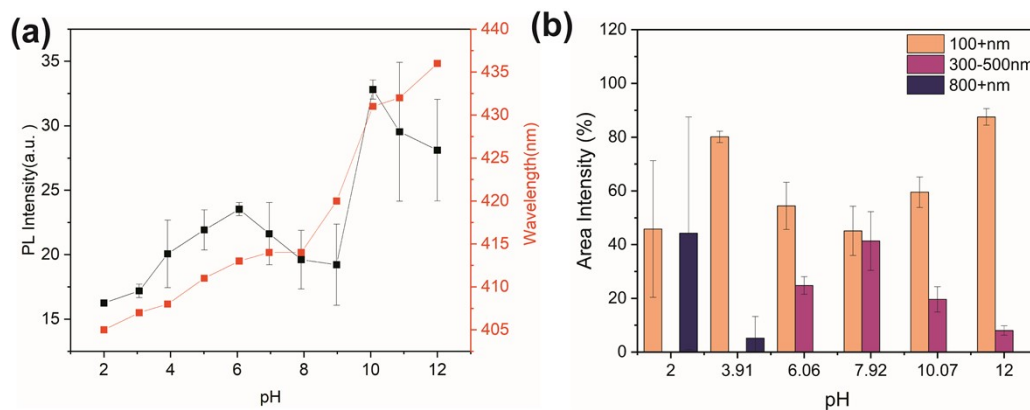

Fig. S9 PL intensity of AL in different pH solution. a) Max fluorescence intensity of AL in different pH and emission wavelengths, b) Size distributions in three ranges (100+ nm, 300-500nm and 800+ nm) of AL ( $c=0.1\text{ g/L}$ ) solution at different pH values.



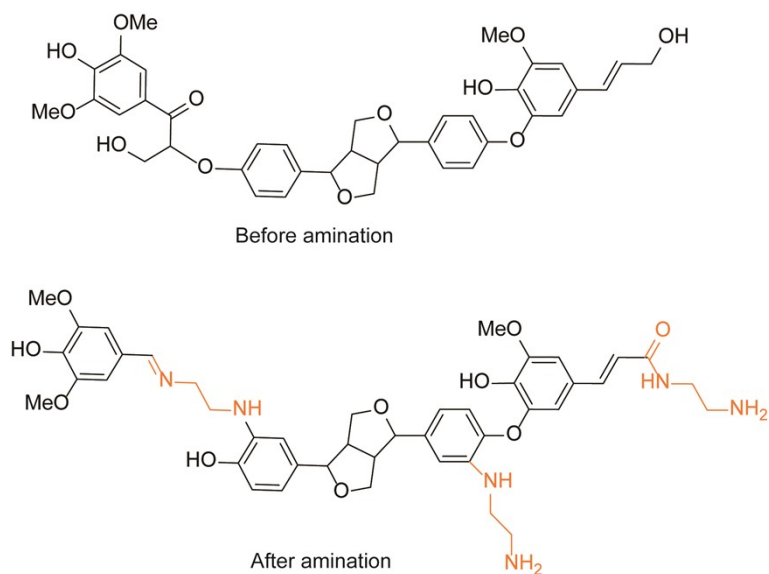

**Fig. S10** Molecular structures of model lignin used in theoretical calculations.

The aminated molecule contains 4 different types of N-containing groups (-NH<sub>2</sub>, -NH-, -C=N-, and -CR-NH-), shown in orange color.

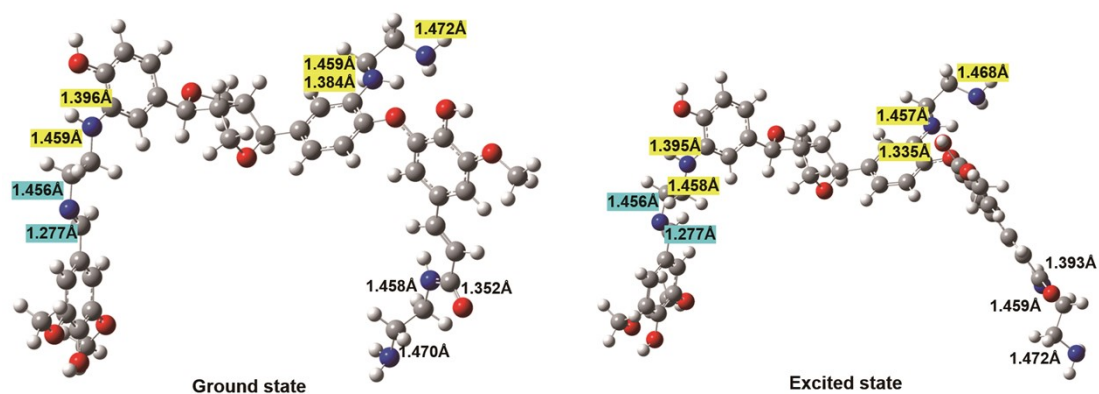

**Fig. S11** Bond length of N-C at the ground state and excited state respectively. Yellow ones were shorter after excitement, while blue ones remained unchanged.

**Table S1.** Parameters of Linear fit in concentration-fluorescence intensity (stage 1: cluster formation).

| <b>sample</b> | <b>Intercept</b> | <b>Slope</b>    | <b>R-Square (COD)</b> |
|---------------|------------------|-----------------|-----------------------|
| NaOH          | 8.03 ± 3.03      | 984.16 ± 90.51  | 0.95171               |
| AL            | 1.82 ± 0.66      | 361.63 ± 19.88  | 0.9822                |
| E-AL          | 6.98 ± 3.12      | 1365.88 ± 93.36 | 0.97273               |
| AL            | 3.51 ± 1.39      | 293.69 ± 41.69  | 0.89212               |
| 100EL         | 1.20 ± 0.42      | 772.93 ± 12.69  | 0.99839               |
| 120EL         | 2.67 ± 1.14      | 1165.17 ± 34.10 | 0.99489               |
| 140EL         | 3.35 ± 1.37      | 1360.50 ± 41.06 | 0.99456               |
| 160EL         | 5.16 ± 2.28      | 1483.74 ± 68.07 | 0.98753               |
| 180EL         | 6.89 ± 2.96      | 2075.58±88.63   | 0.98918               |

**Table S2.** Parameters of Linear fit in concentration-fluorescence intensity (stage 2: increase of cluster numbers).

| <b>sample</b> | <b>Intercept</b>   | <b>Slope</b>         | <b>R-Square<br/>(COD)</b> |
|---------------|--------------------|----------------------|---------------------------|
| NaOH          | $89.76 \pm 19.75$  | $-209.50 \pm 107.50$ | 0.65505                   |
| AL            | $39.56 \pm 2.84$   | $-95.16 \pm 15.47$   | 0.94977                   |
| E-AL          | $142.69 \pm 20.10$ | $-334.78 \pm 109.39$ | 0.82403                   |
| AL            | $29.63 \pm 3.30$   | $-78.04 \pm 17.98$   | 0.90404                   |
| 100EL         | $63.69 \pm 9.11$   | $157.52 \pm 49.60$   | 0.83454                   |
| 120EL         | $95.15 \pm 13.47$  | $129.00 \pm 73.30$   | 0.60764                   |
| 140EL         | $121.48 \pm 23.73$ | $130.40 \pm 129.20$  | 0.33747                   |
| 160EL         | $137.12 \pm 21.45$ | $44.60 \pm 116.78$   | 0.06797                   |
| 180EL         | $146.08 \pm 5.62$  | $187.40 \pm 30.60$   | 0.94939                   |

**Table S3.** The comparison of calculated and experimental values based on model lignin molecules.

| samples            | Calculated results |          | Experimental results |          |
|--------------------|--------------------|----------|----------------------|----------|
|                    | absorption         | emission | absorption           | emission |
| Un-aminated lignin | 286 nm             | 403 nm   | 242 nm               | 420 nm   |
| Aminated lignin    | 321 nm             | 486 nm   | 201 nm               | 447 nm   |
